# Supplementary material for: Zero-dimensional antimony halides with tunable photoluminescence via halogen ligand modulation
Source: Royal Society of Chemistry journal article supplement (doi:10.1039/d3tc03494a), 2023-01-01
Supplement: d3tc03494a1.pdf [file d3tc03494a1.pdf]

## Supporting Information

### **Zero-dimensional antimony halides with tunable photoluminescence via halogen ligand modulation**

Zhaohui Huang<sup>a,b\*</sup>, Enzhi Zhao<sup>a</sup>, Ping Qi<sup>a</sup>, Aixin Song<sup>a\*</sup>

<sup>a</sup>*Key Laboratory of Colloid and Interface Chemistry (Ministry of Education), Shandong University, Jinan 250100, China*

<sup>b</sup>*College of Chemistry and Chemical Engineering, Dezhou University, Dezhou, Shandong Province, 253023, China*

\* Corresponding authors: [huangzhaohui\\_2021@163.com](mailto:huangzhaohui_2021@163.com) and [songaixin@sdu.edu.cn](mailto:songaixin@sdu.edu.cn).

**Table S1** Single crystal X-ray diffraction data of [AVIm]<sub>3</sub>SbCl<sub>6</sub> and [AVIm]<sub>3</sub>SbBr<sub>6</sub>.

| Compound                                          | [AVIm] <sub>3</sub> SbCl <sub>6</sub>                             | [AVIm] <sub>3</sub> SbBr <sub>6</sub>                             |
|---------------------------------------------------|-------------------------------------------------------------------|-------------------------------------------------------------------|
| <b>Empirical formula</b>                          | C <sub>24</sub> H <sub>33</sub> Cl <sub>6</sub> N <sub>6</sub> Sb | C <sub>24</sub> H <sub>33</sub> Br <sub>6</sub> N <sub>6</sub> Sb |
| <b>Formula weight/g·mol<sup>-1</sup></b>          | 740.01                                                            | 1006.41                                                           |
| <b>Crystal system</b>                             | monoclinic                                                        | triclinic                                                         |
| <b>Space group</b>                                | P2 <sub>1</sub> /n                                                | P -1                                                              |
| <b>a/Å</b>                                        | 22.051(3)                                                         | 10.1511(14)                                                       |
| <b>b/Å</b>                                        | 11.9001(17)                                                       | 12.3581(18)                                                       |
| <b>c/Å</b>                                        | 26.397(4)                                                         | 21.957(3)                                                         |
| <b>α/°</b>                                        | 90                                                                | 103.614(5)                                                        |
| <b>β/°</b>                                        | 109.599(6)                                                        | 100.027(5)                                                        |
| <b>γ/°</b>                                        | 90                                                                | 98.090(5)                                                         |
| <b>Volume/Å<sup>3</sup></b>                       | 6525.5(17)                                                        | 2588.3(6)                                                         |
| <b>Z</b>                                          | 8                                                                 | 1                                                                 |
| <b>Density/ g·cm<sup>-3</sup></b>                 | 1.506                                                             | 1.851                                                             |
| <b>μ/mm<sup>-1</sup></b>                          | 11.421                                                            | 14.623                                                            |
| <b>F(000)</b>                                     | 2976.0                                                            | 1367.0                                                            |
| <b>Theta range (data collection)/°</b>            | 4.536 to 144.766                                                  | 4.106 to 54.896                                                   |
| <b>Reflections collected</b>                      | 83228                                                             | 35036                                                             |
| <b>Independent reflections</b>                    | 12853 [R <sub>int</sub> = 0.0464, R <sub>sigma</sub> = 0.0261]    | 11899 [R <sub>int</sub> = 0.0583, R <sub>sigma</sub> = 0.0540]    |
| <b>Data/restraints/parameters</b>                 | 12853/213/667                                                     | 11899/85/468                                                      |
| <b>Goodness-of-fit on F<sup>2</sup></b>           | 1.048                                                             | 1.086                                                             |
| <b>Final R indexes [I ≥ 2σ (I)]</b>               | R <sub>1</sub> = 0.0321, wR <sub>2</sub> = 0.0883                 | R <sub>1</sub> = 0.0390, wR <sub>2</sub> = 0.0916                 |
| <b>Final R indexes [all data]</b>                 | R <sub>1</sub> = 0.0331, wR <sub>2</sub> = 0.0889                 | R <sub>1</sub> = 0.0513, wR <sub>2</sub> = 0.0982                 |
| <b>Largest diff. peak/hole / e Å<sup>-3</sup></b> | 1.76/-0.97                                                        | 0.99/-1.04                                                        |

**Table S2** Bond length and bond angle parameters of [AVIm]<sub>3</sub>SbCl<sub>6</sub>.

| Atom | Atom | Length/Å   | Atom | Atom | Atom | Angle/°   |
|------|------|------------|------|------|------|-----------|
| Sb1  | Cl2  | 2.7401(9)  | Cl2  | Sb1  | Cl10 | 98.94(2)  |
| Sb1  | Cl4  | 2.6198(8)  | Cl4  | Sb1  | Cl2  | 88.74(3)  |
| Sb1  | Cl6  | 2.5733(8)  | Cl4  | Sb1  | Cl8  | 177.08(2) |
| Sb1  | Cl8  | 2.6876(8)  | Cl4  | Sb1  | Cl10 | 92.74(3)  |
| Sb1  | Cl10 | 2.8855(8)  | Cl6  | Sb1  | Cl2  | 171.18(3) |
| Sb1  | Cl12 | 2.5114(8)  | Cl6  | Sb1  | Cl4  | 88.75(3)  |
| Sb2  | Cl1  | 2.6824(8)  | Cl6  | Sb1  | Cl8  | 88.41(3)  |
| Sb2  | Cl3  | 2.6548(8)  | Cl6  | Sb1  | Cl10 | 89.62(2)  |
| Sb2  | Cl5  | 2.6799(8)  | Cl8  | Sb1  | Cl2  | 94.17(3)  |
| Sb2  | Cl7  | 2.5671(8)  | Cl8  | Sb1  | Cl10 | 86.58(3)  |
| Sb2  | Cl9  | 2.7453(9)  | Cl12 | Sb1  | Cl2  | 85.82(3)  |
| Sb2  | Cl11 | 2.6125(8)  | Cl12 | Sb1  | Cl4  | 89.37(3)  |
| N1   | Cl4  | 1.385(4)   | Cl12 | Sb1  | Cl6  | 85.70(3)  |
| N1   | C22  | 1.439(4)   | Cl12 | Sb1  | Cl8  | 91.08(3)  |
| N1   | C34  | 1.325(4)   | Cl12 | Sb1  | Cl10 | 174.82(2) |
| N7   | C26  | 1.373(5)   | Cl1  | Sb2  | Cl9  | 88.72(2)  |
| N7   | C34  | 1.332(4)   | Cl3  | Sb2  | Cl1  | 90.63(3)  |
| N7   | C46  | 1.465(5)   | Cl3  | Sb2  | Cl5  | 88.98(3)  |
| C14  | C26  | 1.340(5)   | Cl3  | Sb2  | Cl9  | 92.94(3)  |
| C22  | C40  | 1.298(5)   | Cl5  | Sb2  | Cl1  | 179.38(2) |
| C23  | C45  | 1.2772(10) | Cl5  | Sb2  | Cl9  | 90.81(3)  |
| C45  | C46  | 1.428(8)   | Cl7  | Sb2  | Cl1  | 89.83(2)  |
| N2   | C9   | 1.386(5)   | Cl7  | Sb2  | Cl3  | 85.42(3)  |
| N2   | Cl7  | 1.424(6)   | Cl7  | Sb2  | Cl5  | 90.62(3)  |
| N2   | C38  | 1.320(5)   | Cl7  | Sb2  | Cl9  | 177.80(3) |
| N11  | C25  | 1.483(6)   | Cl7  | Sb2  | Cl11 | 88.73(3)  |
| N11  | C33  | 1.381(6)   | Cl11 | Sb2  | Cl1  | 88.82(3)  |
| N11  | C38  | 1.320(5)   | Cl11 | Sb2  | Cl3  | 174.13(3) |
| C9   | C33  | 1.321(7)   | Cl11 | Sb2  | Cl5  | 91.62(3)  |
| Cl7  | C43  | 1.291(6)   | Cl11 | Sb2  | Cl9  | 92.90(3)  |
| C25  | C35  | 1.507(6)   | C14  | N1   | C22  | 126.5(3)  |
| C35  | C41  | 1.283(7)   | C34  | N1   | C14  | 109.5(3)  |
| N3   | C8   | 1.312(4)   | C34  | N1   | C22  | 124.0(3)  |
| N3   | Cl10 | 1.377(4)   | C26  | N7   | C46  | 124.6(3)  |
| N3   | C31  | 1.476(4)   | C34  | N7   | C26  | 109.1(3)  |
| N4   | C6   | 1.385(4)   | C34  | N7   | C46  | 126.3(3)  |
| N4   | C8   | 1.343(4)   | C26  | Cl4  | N1   | 106.4(3)  |
| N4   | Cl6  | 1.424(4)   | C40  | C22  | N1   | 123.5(3)  |
| C6   | Cl10 | 1.345(5)   | C14  | C26  | N7   | 107.5(3)  |
| Cl1  | Cl9  | 1.2778(10) | N1   | C34  | N7   | 107.6(3)  |
| Cl6  | C44  | 1.297(5)   | C23  | C45  | C46  | 141.3(9)  |

|     |     |            |     |     |     |          |
|-----|-----|------------|-----|-----|-----|----------|
| C19 | C31 | 1.447(6)   | C45 | C46 | N7  | 111.3(4) |
| N5  | C28 | 1.381(4)   | C9  | N2  | C17 | 127.1(4) |
| N5  | C30 | 1.322(4)   | C38 | N2  | C9  | 109.0(4) |
| N5  | C42 | 1.471(4)   | C38 | N2  | C17 | 123.7(3) |
| N6  | C12 | 1.390(4)   | C33 | N11 | C25 | 126.2(4) |
| N6  | C30 | 1.338(4)   | C38 | N11 | C25 | 125.7(4) |
| N6  | C48 | 1.419(5)   | C38 | N11 | C33 | 107.5(4) |
| C3  | C48 | 1.311(6)   | C33 | C9  | N2  | 105.9(4) |
| C5  | C15 | 1.310(7)   | C43 | C17 | N2  | 123.1(5) |
| C12 | C28 | 1.345(5)   | N11 | C25 | C35 | 110.7(3) |
| C15 | C42 | 1.475(6)   | C9  | C33 | N11 | 108.8(4) |
| N8  | C18 | 1.385(4)   | C41 | C35 | C25 | 124.8(4) |
| N8  | C20 | 1.337(4)   | N2  | C38 | N11 | 108.8(3) |
| N8  | C24 | 1.428(4)   | C8  | N3  | C10 | 109.0(3) |
| N10 | C4  | 1.384(4)   | C8  | N3  | C31 | 124.7(3) |
| N10 | C13 | 1.465(4)   | C10 | N3  | C31 | 126.1(3) |
| N10 | C20 | 1.321(4)   | C6  | N4  | C16 | 128.4(3) |
| C2  | C36 | 1.299(6)   | C8  | N4  | C6  | 107.9(3) |
| C4  | C18 | 1.339(5)   | C8  | N4  | C16 | 123.7(3) |
| C7  | C24 | 1.307(5)   | C10 | C6  | N4  | 106.9(3) |
| C13 | C36 | 1.493(6)   | N3  | C8  | N4  | 108.9(3) |
| C36 | H36 | 0.95       | C6  | C10 | N3  | 107.3(3) |
| N9  | C1  | 1.329(5)   | C44 | C16 | N4  | 124.4(3) |
| N9  | C29 | 1.368(5)   | C11 | C19 | C31 | 125.7(6) |
| N9  | C37 | 1.473(5)   | C19 | C31 | N3  | 109.8(3) |
| N12 | C1  | 1.332(5)   | C28 | N5  | C42 | 126.2(3) |
| N12 | C27 | 1.402(5)   | C30 | N5  | C28 | 108.7(3) |
| N12 | C32 | 1.390(5)   | C30 | N5  | C42 | 125.1(3) |
| C21 | C37 | 1.547(8)   | C12 | N6  | C48 | 127.6(3) |
| C21 | C47 | 1.2789(10) | C30 | N6  | C12 | 108.4(3) |
| C27 | C39 | 1.328(6)   | C30 | N6  | C48 | 123.9(3) |
| C29 | C32 | 1.321(6)   | C28 | C12 | N6  | 106.6(3) |
|     |     |            | C5  | C15 | C42 | 123.3(4) |
|     |     |            | C12 | C28 | N5  | 107.7(3) |
|     |     |            | N5  | C30 | N6  | 108.6(3) |
|     |     |            | N5  | C42 | C15 | 112.1(3) |
|     |     |            | C3  | C48 | N6  | 123.2(3) |
|     |     |            | C18 | N8  | C24 | 127.5(3) |
|     |     |            | C20 | N8  | C18 | 108.2(3) |
|     |     |            | C20 | N8  | C24 | 124.2(3) |
|     |     |            | C4  | N10 | C13 | 125.9(3) |
|     |     |            | C20 | N10 | C4  | 108.3(3) |
|     |     |            | C20 | N10 | C13 | 125.8(3) |
|     |     |            | C18 | C4  | N10 | 107.8(3) |

|     |     |     |          |
|-----|-----|-----|----------|
| N10 | C13 | C36 | 112.6(3) |
| C4  | C18 | N8  | 106.8(3) |
| N10 | C20 | N8  | 108.9(3) |
| C7  | C24 | N8  | 123.5(3) |
| C2  | C36 | C13 | 126.3(4) |
| C1  | N9  | C29 | 108.5(3) |
| C1  | N9  | C37 | 126.4(3) |
| C29 | N9  | C37 | 125.1(4) |
| C1  | N12 | C27 | 125.2(3) |
| C1  | N12 | C32 | 107.1(3) |
| C32 | N12 | C27 | 127.7(3) |
| N9  | C1  | N12 | 108.8(3) |
| C47 | C21 | C37 | 126.5(8) |
| C39 | C27 | N12 | 123.3(4) |
| C32 | C29 | N9  | 107.7(4) |
| C29 | C32 | N12 | 107.9(3) |
| N9  | C37 | C21 | 107.5(4) |

**Table S3** Bond length and bond angle parameters of [AVIm]<sub>3</sub>SbBr<sub>6</sub>.

| Atom | Atom | Length/Å  | Atom | Atom | Atom | Angle/°     |
|------|------|-----------|------|------|------|-------------|
| Sb01 | Br05 | 2.7822(4) | Br05 | Sb01 | Br05 | 180         |
| Sb01 | Br05 | 2.7822(4) | Br05 | Sb01 | Br03 | 89.247(14)  |
| Sb01 | Br03 | 2.8097(4) | Br05 | Sb01 | Br03 | 90.752(14)  |
| Sb01 | Br03 | 2.8097(4) | Br05 | Sb01 | Br03 | 90.752(14)  |
| Sb01 | Br04 | 2.8183(4) | Br05 | Sb01 | Br03 | 89.248(14)  |
| Sb01 | Br04 | 2.8183(4) | Br03 | Sb01 | Br03 | 180         |
| Sb02 | Br08 | 2.7698(5) | Br05 | Sb01 | Br04 | 90.742(14)  |
| Sb02 | Br0B | 2.7753(5) | Br05 | Sb01 | Br04 | 89.258(14)  |
| Sb02 | Br0A | 2.7821(5) | Br03 | Sb01 | Br04 | 92.257(13)  |
| Sb02 | Br06 | 2.8104(5) | Br03 | Sb01 | Br04 | 87.743(13)  |
| Sb02 | Br09 | 2.8400(5) | Br05 | Sb01 | Br04 | 89.259(14)  |
| Sb02 | Br07 | 2.8524(6) | Br05 | Sb01 | Br04 | 90.741(14)  |
| N00C | C00O | 1.334(5)  | Br03 | Sb01 | Br04 | 87.744(13)  |
| N00C | C00T | 1.375(5)  | Br03 | Sb01 | Br04 | 92.256(13)  |
| N00C | C00X | 1.427(6)  | Br04 | Sb01 | Br04 | 180         |
| N00D | C00L | 1.317(6)  | Br08 | Sb02 | Br0B | 96.147(17)  |
| N00D | C00J | 1.356(6)  | Br08 | Sb02 | Br0A | 87.582(16)  |
| N00D | C00Z | 1.472(6)  | Br0B | Sb02 | Br0A | 91.878(17)  |
| N00E | C00N | 1.302(5)  | Br08 | Sb02 | Br06 | 89.087(15)  |
| N00E | C00U | 1.360(5)  | Br0B | Sb02 | Br06 | 87.628(16)  |
| N00E | C00P | 1.467(5)  | Br0A | Sb02 | Br06 | 176.562(17) |
| N00F | C00L | 1.324(6)  | Br08 | Sb02 | Br09 | 93.593(17)  |

|      |      |            |      |      |      |             |
|------|------|------------|------|------|------|-------------|
| N00F | C00M | 1.369(6)   | Br0B | Sb02 | Br09 | 170.061(18) |
| N00F | C00W | 1.426(6)   | Br0A | Sb02 | Br09 | 90.503(16)  |
| N00G | C00N | 1.311(5)   | Br06 | Sb02 | Br09 | 90.557(15)  |
| N00G | C010 | 1.383(6)   | Br08 | Sb02 | Br07 | 176.635(15) |
| N00G | C013 | 1.430(6)   | Br0B | Sb02 | Br07 | 84.684(17)  |
| N00H | C00R | 1.319(6)   | Br0A | Sb02 | Br07 | 89.132(17)  |
| N00H | C015 | 1.359(6)   | Br06 | Sb02 | Br07 | 94.209(15)  |
| N00H | C011 | 1.441(6)   | Br09 | Sb02 | Br07 | 85.706(16)  |
| N00I | C00O | 1.321(6)   | C00O | N00C | C00T | 109.0(4)    |
| N00I | C00S | 1.393(6)   | C00O | N00C | C00X | 123.3(4)    |
| N00I | C014 | 1.480(6)   | C00T | N00C | C00X | 127.6(4)    |
| C00J | C00M | 1.337(7)   | C00L | N00D | C00J | 108.1(4)    |
| N00K | C00R | 1.314(6)   | C00L | N00D | C00Z | 124.7(4)    |
| N00K | C016 | 1.352(7)   | C00J | N00D | C00Z | 126.9(4)    |
| N00K | C01B | 1.464(7)   | C00N | N00E | C00U | 108.0(4)    |
| C00P | C00Q | 1.471(6)   | C00N | N00E | C00P | 127.2(4)    |
| C00Q | C00V | 1.273(7)   | C00U | N00E | C00P | 124.6(4)    |
| C00S | C00T | 1.339(7)   | C00L | N00F | C00M | 107.9(4)    |
| C00U | C010 | 1.336(6)   | C00L | N00F | C00W | 122.8(4)    |
| C00W | C017 | 1.283(8)   | C00M | N00F | C00W | 129.3(4)    |
| C00X | C01C | 1.286(7)   | C00N | N00G | C010 | 107.7(4)    |
| C00Y | C012 | 1.267(7)   | C00N | N00G | C013 | 124.9(4)    |
| C00Z | C012 | 1.483(7)   | C010 | N00G | C013 | 127.4(4)    |
| C011 | C01A | 1.265(7)   | C00R | N00H | C015 | 107.8(4)    |
| C013 | C018 | 1.288(7)   | C00R | N00H | C011 | 127.3(4)    |
| C014 | C01G | 1.399(10)  | C015 | N00H | C011 | 124.8(5)    |
| C015 | C016 | 1.332(8)   | C00O | N00I | C00S | 108.2(4)    |
| C01B | C01E | 1.434(10)  | C00O | N00I | C014 | 126.3(4)    |
| C01E | C01F | 1.253(10)  | C00S | N00I | C014 | 125.5(4)    |
| C01G | C31A | 1.025(18)  | C00M | C00J | N00D | 107.9(4)    |
| C01G | C31  | 1.2496(10) | C00R | N00K | C016 | 108.0(4)    |
| Sb01 | Sb02 | 11.1144(5) | C00R | N00K | C01B | 124.9(5)    |
| Sb01 | Sb01 | 10.2157(4) | C016 | N00K | C01B | 127.0(5)    |
| Sb01 | Sb02 | 9.6228(4)  | N00D | C00L | N00F | 109.2(4)    |
| Sb01 | Sb01 | 10.2157(4) | C00J | C00M | N00F | 106.9(4)    |
| Sb01 | Sb01 | 17.0430(6) | N00E | C00N | N00G | 110.1(4)    |
|      |      |            | N00I | C00O | N00C | 108.5(4)    |
|      |      |            | N00E | C00P | C00Q | 113.0(4)    |
|      |      |            | C00V | C00Q | C00P | 124.4(5)    |
|      |      |            | C00T | C00S | N00I | 107.4(4)    |
|      |      |            | C00S | C00T | N00C | 106.9(4)    |
|      |      |            | C010 | C00U | N00E | 108.0(4)    |
|      |      |            | C017 | C00W | N00F | 123.5(5)    |
|      |      |            | C01C | C00X | N00C | 122.9(4)    |

|      |      |      |           |
|------|------|------|-----------|
| N00D | C00Z | C012 | 109.9(4)  |
| C00U | C010 | N00G | 106.2(4)  |
| C00Y | C012 | C00Z | 124.9(5)  |
| C018 | C013 | N00G | 124.2(5)  |
| C01G | C014 | N00I | 112.8(6)  |
| C015 | C016 | N00K | 107.7(5)  |
| C01E | C01B | N00K | 113.0(6)  |
| C01F | C01E | C01B | 125.3(9)  |
| C31A | C01G | C014 | 142.4(15) |
| C31  | C01G | C014 | 148.1(12) |

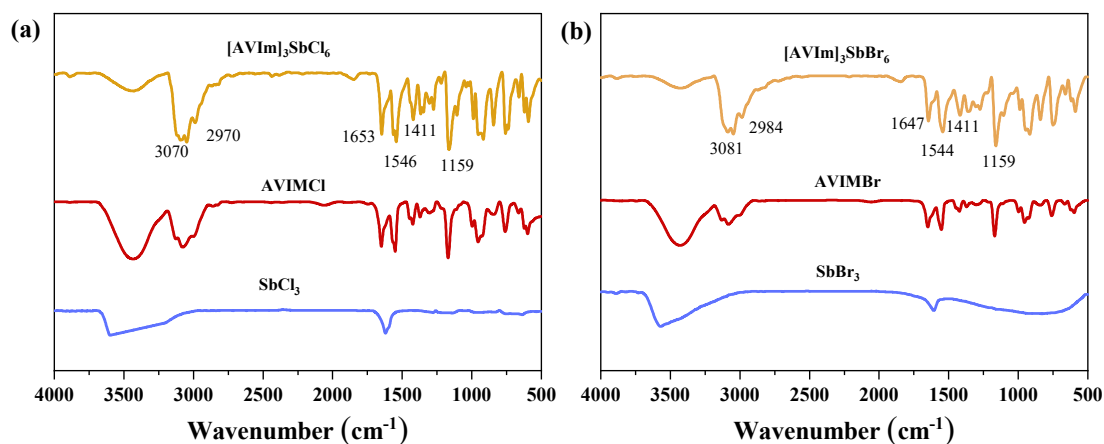

**Fig. S1** FTIR spectra of  $[\text{AVIm}]_3\text{SbCl}_6$ ,  $[\text{AVIm}]_3\text{SbBr}_6$  and their raw materials.

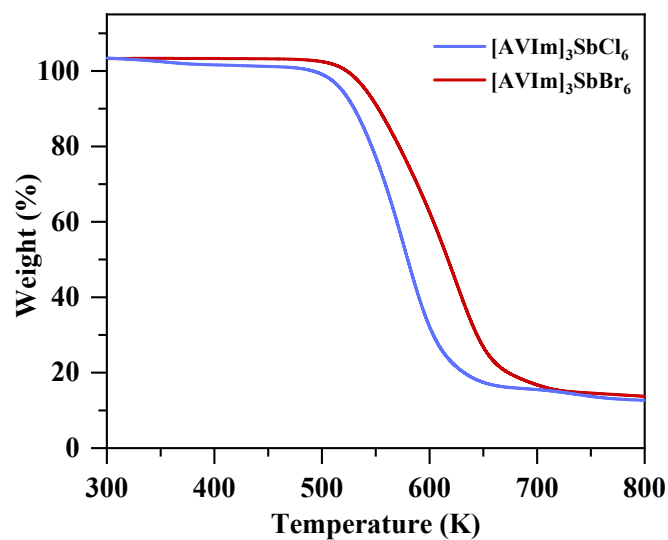

**Fig. S2** TGA curves of  $[\text{AVIm}]_3\text{SbCl}_6$  and  $[\text{AVIm}]_3\text{SbBr}_6$ .

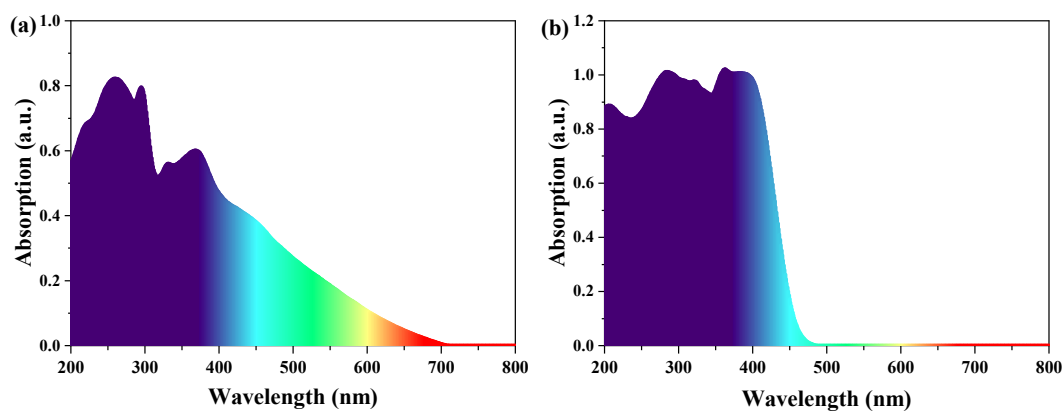

**Fig. S3** UV-vis absorption spectra of (a)  $[\text{AVIm}]_3\text{SbCl}_6$  and (b)  $[\text{AVIm}]_3\text{SbBr}_6$ .

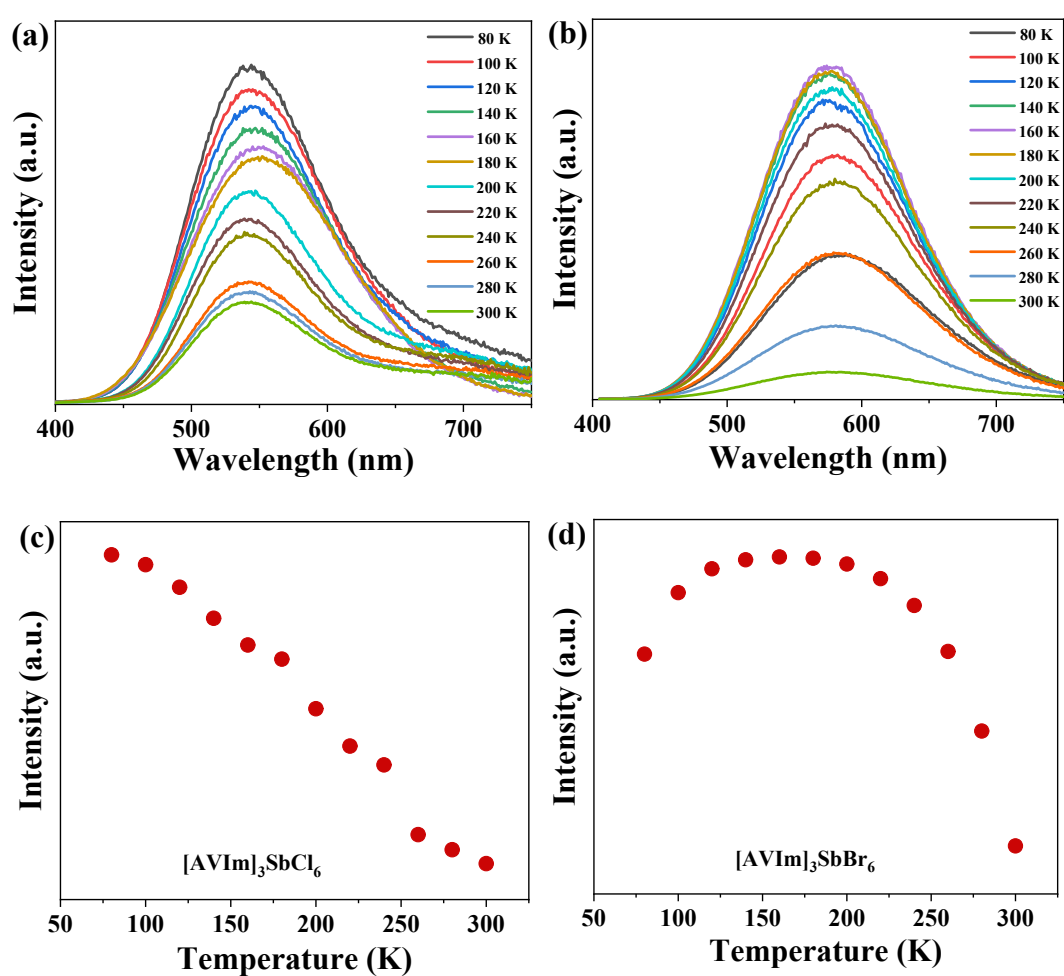

**Fig. S4** Temperature-dependent emission spectra of (a)  $[\text{AVIm}]_3\text{SbCl}_6$  and (b)  $[\text{AVIm}]_3\text{SbBr}_6$  in the range of 80 – 300 K. Corresponding integrated emission intensity of (c)  $[\text{AVIm}]_3\text{SbCl}_6$  and (d)  $[\text{AVIm}]_3\text{SbBr}_6$  in the range of 80 – 300 K. The excitation wavelength was 365 nm for  $[\text{AVIm}]_3\text{SbCl}_6$  and 395 nm for  $[\text{AVIm}]_3\text{SbBr}_6$ .
